# Supplementary material for: Robust superhydrophobic silicone/epoxy functional coating with excellent chemical stability and self-cleaning ability
Source: Royal Society of Chemistry journal article supplement (doi:10.1039/d3nr04062c), 2023-01-01
Supplement: d3nr04062c6.pdf [file d3nr04062c6.pdf]

# Supporting Information

## **Robust superhydrophobic silicone/epoxy functional coating with excellent chemical stability and self-cleaning ability**

**Weidong Huang<sup>a,c</sup>, Xiaoli Jiang<sup>a</sup>, Yagang Zhang<sup>\*a,c</sup>, Zhiqiang Tang<sup>a</sup>, Zicai Sun<sup>\*b</sup>,  
Zhijun Liu<sup>b</sup>, Lin Zhao<sup>a</sup>, Yanxia Liu<sup>a</sup>**

<sup>a</sup> School of Materials and Energy, University of Electronic Science and Technology of  
China, Chengdu, 611731, China.

<sup>b</sup> Dongguan Yimei Material Technology Co., Ltd., Dongguan, 523000, China.

<sup>c</sup> State Key Laboratory of Electronic Thin Films and Integrated Devices, University of  
Electronic Science and Technology of China, Chengdu 610054, China

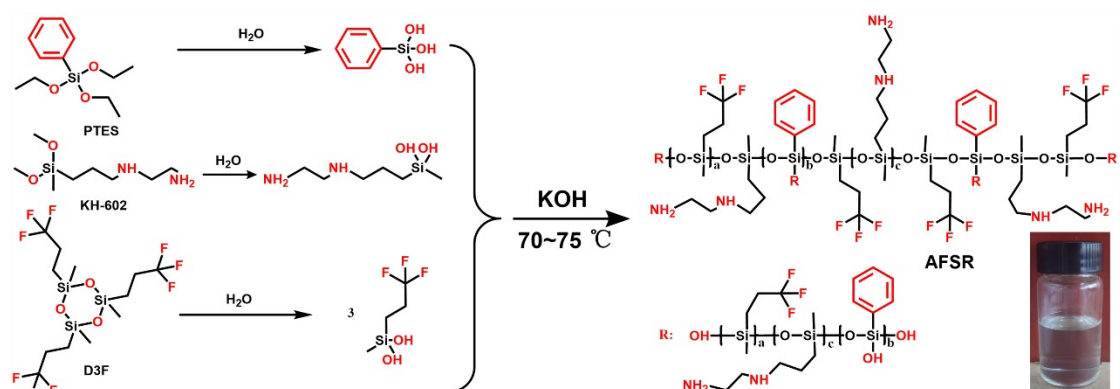

**Figure S1.** Synthesis of functional AFSR via hydrolytic condensation of D3F, KH-602, and PTES. The inset is an image of the target product, which has good transparency properties.

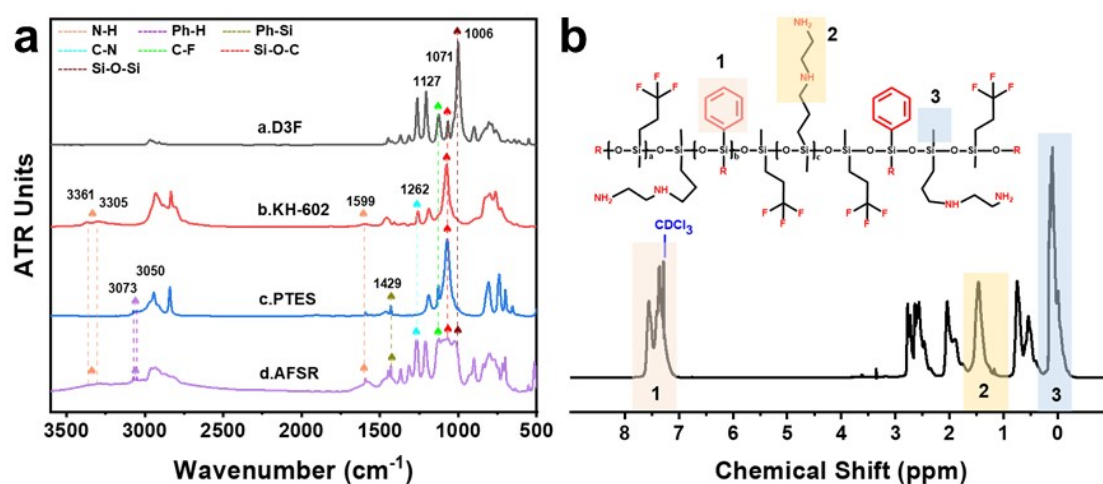

**Figure S2.** (a) The ATR-FTIR spectra of AFSR and organic silicone monomer, and (b)  $^1\text{H}$ -NMR spectra of AFSR.

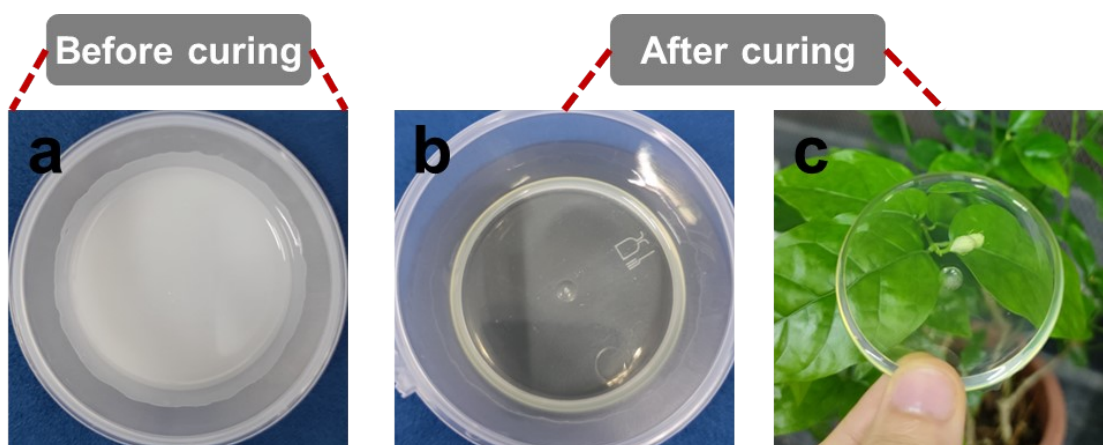

**Figure S3.** Visual changes before and after AFSR and EP crosslinking curing reactions. (a) Before curing uniform opaque milky white colloid. (b) After curing hard and highly transparent polymer (AFSR/EP). (c) A picture of a transparent polymer at the front of the plant after curing.

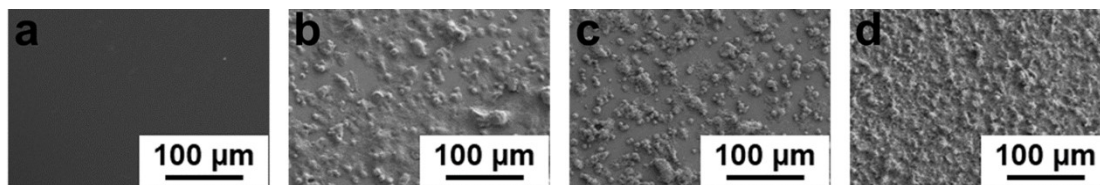

**Figure S4.** (a) FE-SEM images of AFSR/EP@n-SiO<sub>2</sub> coatings with different content of n-SiO<sub>2</sub> particles at 100 μm scale. a) n-SiO<sub>2</sub> = 0 wt%, b) n-SiO<sub>2</sub> = 3 wt%, c) n-SiO<sub>2</sub> = 4 wt%, and d) 5 wt %, respectively.

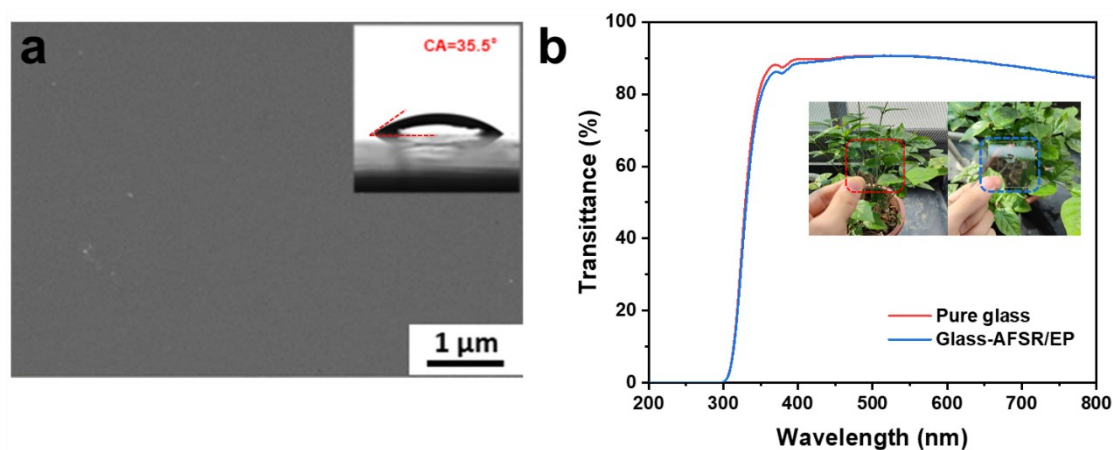

**Figure S5.** (a) FE-SEM images of pure glass, and (b) transmittance curves of pure glass and hydrophobic coating with AFSR/EP at different wavelengths, insets of (b) are the optical photos of pure glass and hydrophobic coating with AFSR/EP at the front of the plant.

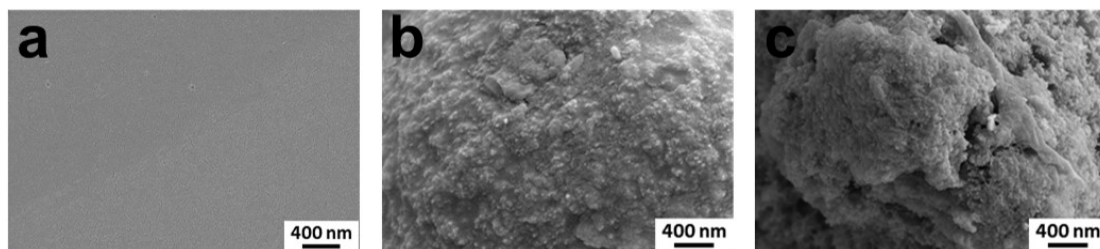

**Figure S6.** FE-SEM images of (a) n-SiO<sub>2</sub> = 0 wt%, (b) n-SiO<sub>2</sub> = 3 wt%, and (c) n-SiO<sub>2</sub> = 4 wt%.

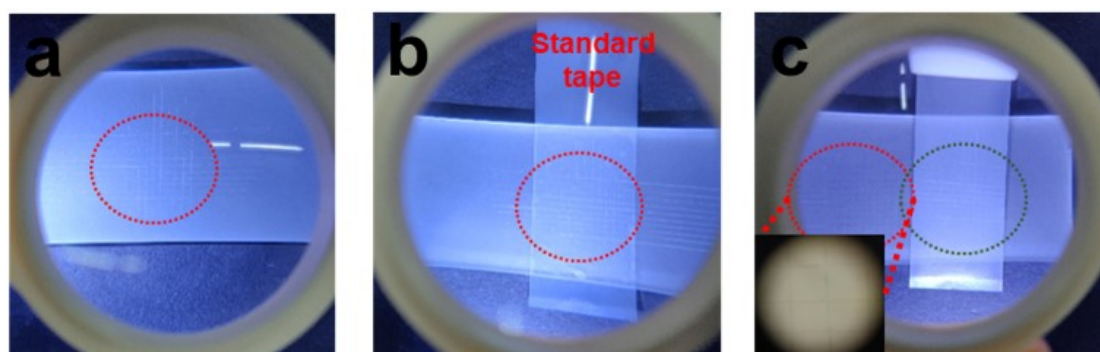

**Figure S7.** Optical picture of paint film adhesion test. (a) After the knife cut. (b) Standard tape attachment. (c) After the coating has been tested for standard adhesive tape.

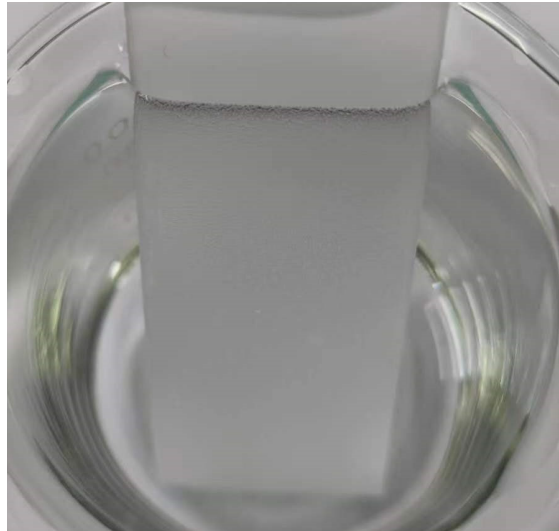

**Figure S8.** Optical image: Air pocket formed by micron and nanometre rough structure in liquid.

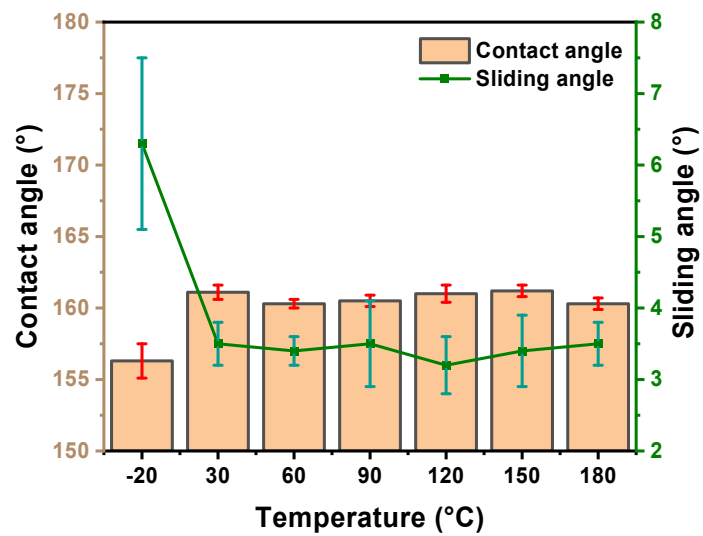

**Figure S9.** Variation of the CA and SA under different testing conditions of temperature treatment.

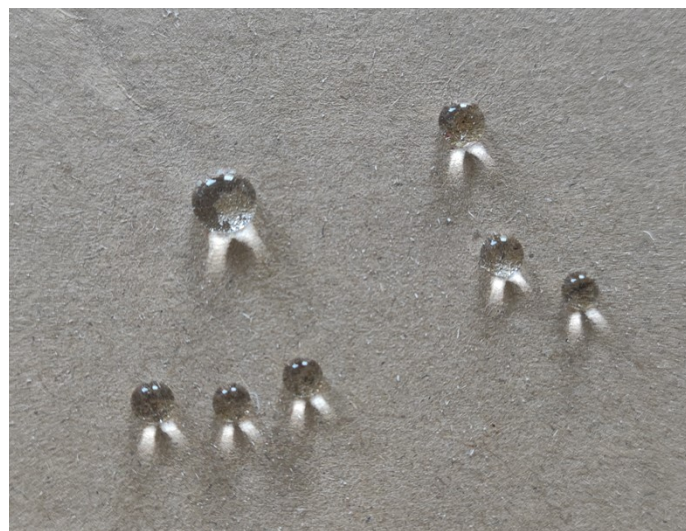

**Figure S10.** Superhydrophobic image of coated sample: coated cardboard after being sprayed and left at room temperature for 24 h.

**Table S1.** Comparison of the mechanical robustness and physicochemical stability of our coatings with that of the literature reported superhydrophobic coating.

| substrate     | method                 | mechanical robustness                                                      | UV irradiation                                       | chemical durability                                                                |                                                              |                                                              | ref       |
|---------------|------------------------|----------------------------------------------------------------------------|------------------------------------------------------|------------------------------------------------------------------------------------|--------------------------------------------------------------|--------------------------------------------------------------|-----------|
|               |                        |                                                                            |                                                      | acidic                                                                             | alkali                                                       | saline                                                       |           |
| glass         | spraying               | CA: 152.6°, SA: 9.6° after 250cm 100 # sandpaper abrasion under 200 g      | 30W<br>CA: 153.2° SA:6.3° after exposure for 32 days | HCl, pH = 1<br>CA: 151.3°, SA:11.3° after immersion for 24 h                       | KOH, pH = 14<br>CA: 152.2°, SA:8.7° after immersion for 24 h | NaCl, 10 wt %<br>CA: 153.2° SA:6.3° after immersion for 48 h | this work |
| glass         | template               | CA < 150°, SA ~ * after 2250cm 220 # sandpaper abrasion under 9.8 kPa      | 40 W<br>CA~ 160° SA~* after exposure for 7 days      | *, pH=1<br>CA~160°, SA~* after immersion for 12 h                                  | *, pH=13<br>CA~160°, SA~* after immersion for 12 h           | NaCl, 10 wt %<br>CA~153°, SA~* after immersion for 4 h       | 5         |
| glass         | spraying               | CA < 150°, SA ~ * after 80 cycles of 220 # sandpaper abrasion under 1000 g | NA                                                   | NA                                                                                 | NA                                                           | NA                                                           | 7         |
| glass         | dip + annealing        | CA~150°, SA~ 16 after 1200cm of 1200 # sandpaper abrasion under 50 g       | 20W<br>CA: 152° SA:6.5° after exposure for 30 days   | *, pH = 1<br>CA~152°, SA~11.8° after immersion for 24 h                            | *, pH = 14<br>CA~ 151°, SA~15.0° after immersion for 24 h    | NA                                                           | 8         |
| copper        | electrodeposition      | NA                                                                         | NA                                                   | H <sub>2</sub> SO <sub>4</sub> , pH=1<br>CA~152°, SA~4* after immersion for 13 h   | NaOH, pH=13<br>CA~155°, SA~3 after immersion for 13 h        | NaCl, 3.5 wt %<br>CA~130°, SA~3° after immersion for 13 h    | 24        |
| glass         | spraying               | NA                                                                         | 15W<br>CA~ 145° SA~* after exposure for 30 days      | *, pH=1<br>CA~155°, SA~* after immersion for 72 h                                  | *, pH=14<br>CA~154°, SA~* after immersion for 72 h           | NA                                                           | 45        |
| glass         | drop-cast              | NA                                                                         | NA                                                   | HCl, pH=1<br>CA~155°, SA~* after immersion for 5 h                                 | *, pH=13<br>CA~155°, SA~* after immersion for 5 h            | NA                                                           | 50        |
| glass         | spraying               | CA~ 152°, SA~ 9.7° after 700cm 800 # sandpaper abrasion under 50 g         | 1kW<br>CA~ 153° SA~4.8° after exposure for 2 days    | HCl, pH = 2<br>CA~154°, SA~5° after immersion for 1 h                              | NaOH, pH = 13<br>CA~153°, SA~8° after immersion for 1 h      | NaCl, 3.5 wt %<br>CA~152°, SA~9° after immersion for 1 h     | 62        |
| polycarbonate | template               | CA~150°, SA~ 15 after 30cm of 1000 # sandpaper abrasion under 26kPa        | NA                                                   | 10% HCl<br>CA~150°, SA~10.0° after immersion for 200 min                           | 10% KOH<br>CA ~150°, SA~10.0° after immersion for 200 min    | NA                                                           | 64        |
| glass         | dip-coating            | NA                                                                         | NA                                                   | HCl, pH = 3<br>CA~149, SA<5° after immersion for 72 min                            | NaOH, pH = 9<br>CA~134, SA<10° after immersion for 60 min    | NA                                                           | 65        |
| steel         | electrostatic spraying | CA < 150°, SA ~ * after 1350cm * # sandpaper abrasion under 2000 g         | 60 W<br>CA~ 152° SA~* after exposure for 2 days      | *, pH=2<br>CA~155°, SA~* after immersion for 4 h                                   | *, pH=12<br>CA~154°, SA~* after immersion for 4 h            | NaCl, 10 wt %<br>CA~153°, SA~* after immersion for 4 h       | 66        |
| glass         | spin-coating           | CA ~146°, SA ~ * after three cycles sandpaper abrasion under 0.52 kPa      | NA                                                   | H <sub>2</sub> SO <sub>4</sub> , pH=1<br>CA ~145°, SA~* after immersion for 10 min | *, pH=14<br>CA~145°, SA~* after immersion for 10 min         | NA                                                           | 67        |

a) \*: Data that are not listed explicitly in the literature; b) NA: not available
